# Supplementary material for: Efficacy and safety of curcuminoids alone in alleviating pain and dysfunction for knee osteoarthritis: a systematic review and meta-analysis of randomized controlled trials
Source: PubMed Central journal article supplement (PMC9580113; doi:10.1186/s12906-022-03740-9), 2022-10-19
Supplement: 12906_2022_3740_MOESM3_ESM.pdf [file 12906_2022_3740_MOESM3_ESM.pdf]

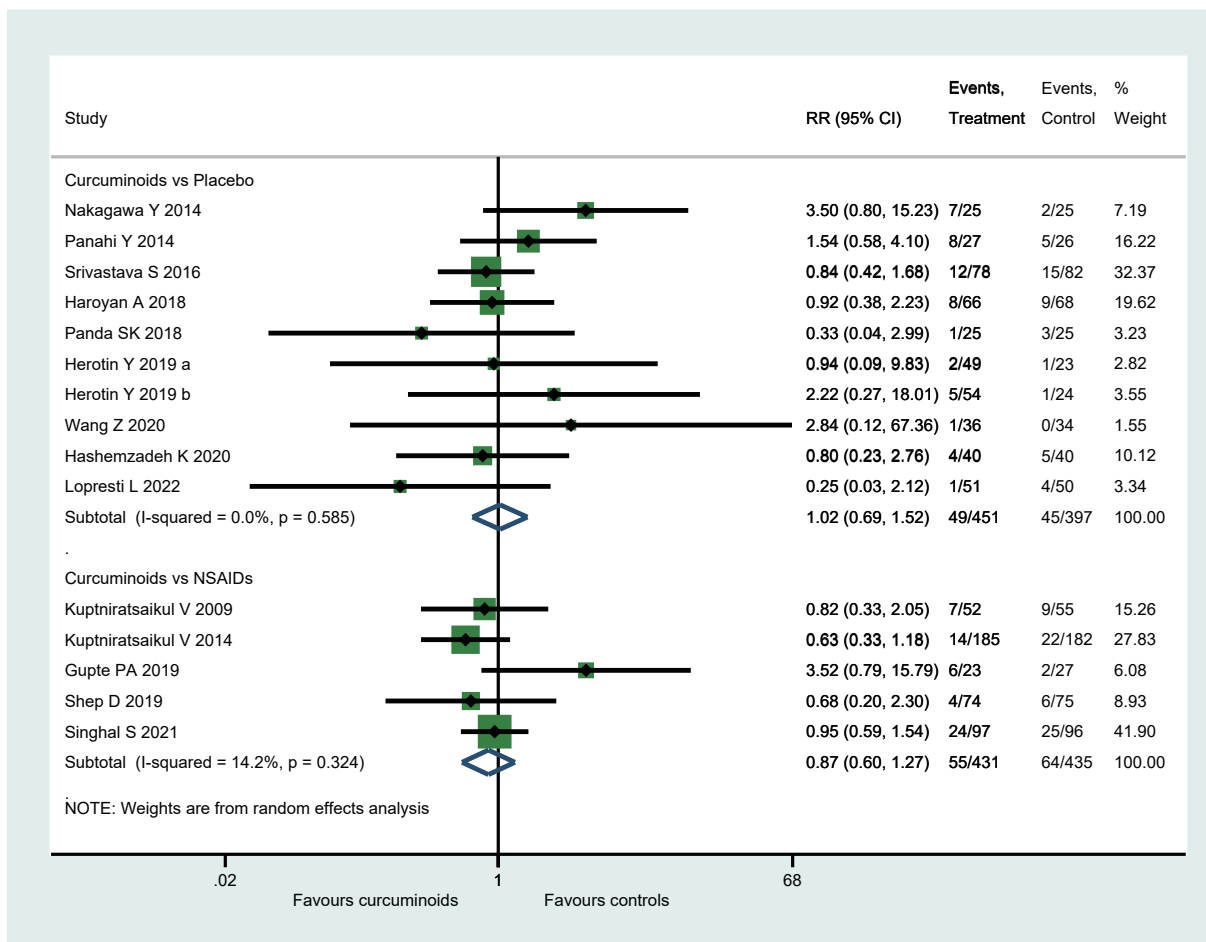

**Supplementary Figure 1.** Forest plot portraying the risk ratio with 95% confidence interval of withdrawal rate.

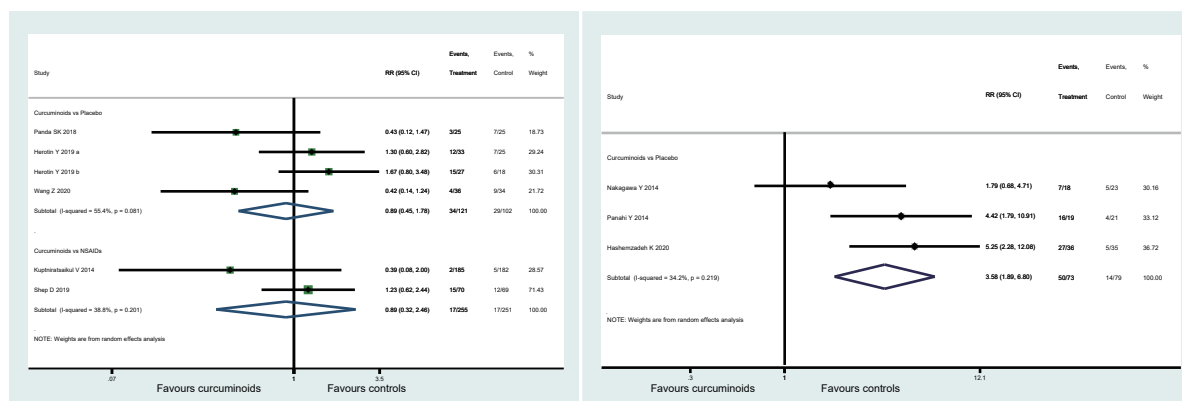

(A)

(B)

**Supplementary Figure 2.** Forest plot portraying the risk ratio with 95% confidence interval of (A) use rate and (B) discontinuation rate of rescue medications.

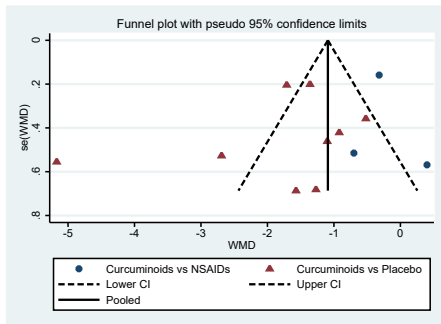

(A)

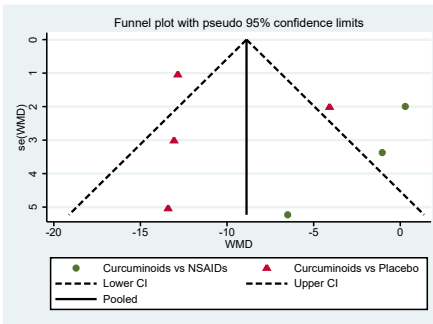

(B)

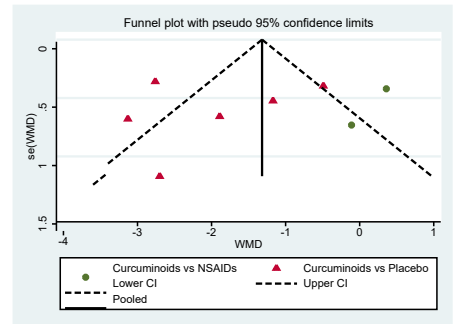

(C)

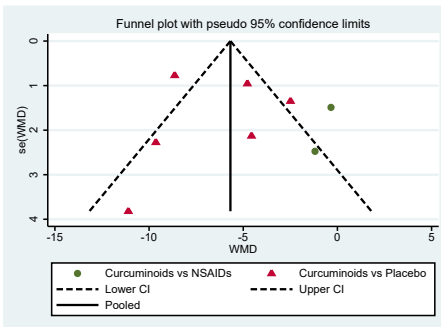

(D)

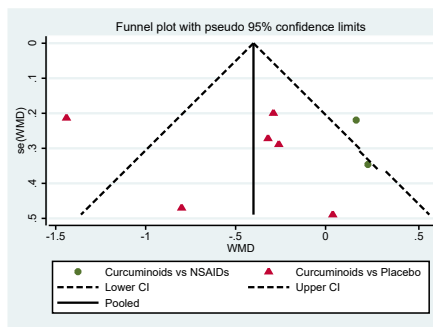

(E)

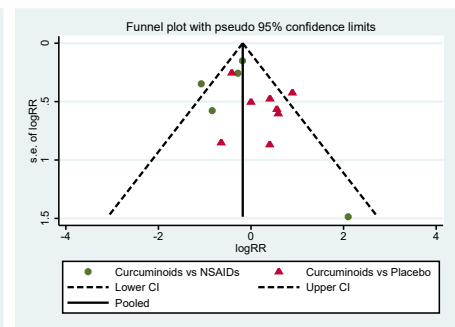

(F)

**Supplementary Figure 3.** Funnel plots of publication bias: (A) VAS for pian; (B) WOMAC total score; (C) WOMAC pain score; (D) WOMAC function score; (E) WOMAC stiffness score; (F) adverse events.
